# Supplementary material for: MSD1 regulates pedicellate spikelet fertility in sorghum through the jasmonic acid pathway
Source: PubMed Central journal article supplement (PMC5826930; doi:10.1038/s41467-018-03238-4), 2018-02-26
Supplement: 41467_2018_3238_MOESM1_ESM.pdf [file 41467_2018_3238_MOESM1_ESM.pdf]

*Supplementary Information*

Jiao and Lee *et al.*,

MSD1 Regulates Pedicellate Spikelet Fertility in Sorghum through the Jasmonic  
Acid Pathway

|                         |                                                                                   |                                                                                   |                                                                                    |                                                                                     |                                                                                     |
|-------------------------|-----------------------------------------------------------------------------------|-----------------------------------------------------------------------------------|------------------------------------------------------------------------------------|-------------------------------------------------------------------------------------|-------------------------------------------------------------------------------------|
| BTx623                  | 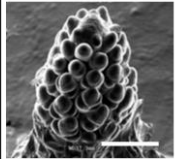 |  |  |  |  |
| Developmental stage     | Stage 1                                                                           | Stage 2                                                                           | Stage 3                                                                            | Stage 4                                                                             | Stage 5                                                                             |
|                         | Inflorescence meristem 1                                                          | Inflorescence meristem 2                                                          | Floral transition                                                                  | Floral Stage 1                                                                      | Floral Stage 2                                                                      |
|                         |                                                                                   |                                                                                   |                                                                                    | SS<br>Less than ~2mm                                                                | SS<br>>4mm                                                                          |
|                         |                                                                                   |                                                                                   |                                                                                    | PS<br>Less than ~1mm                                                                | PS<br>>2mm                                                                          |
| Length of inflorescence | 1-3mm                                                                             | 3-5mm                                                                             | 5-15mm                                                                             | 4.5-7cm                                                                             | 10-15cm                                                                             |
| Leaf number             | 7.3-8.3                                                                           | 8.3-9.3                                                                           | 9.3-10.3                                                                           | 10.3-12                                                                             | 13-14                                                                               |

**Supplementary Fig. 1. Detailed description of the inflorescence developmental stages defined in this study.** Top: SEM showing inflorescence developmental stages in BTx623. Bar for Stage 1 and 3: 500um; Bar for Stage 2, 4 and 5: 1mm. Stage 3-5: Red asterisks indicate sessile spikelet (SS), and blue asterisks indicate pedicellate spikelet(PS).

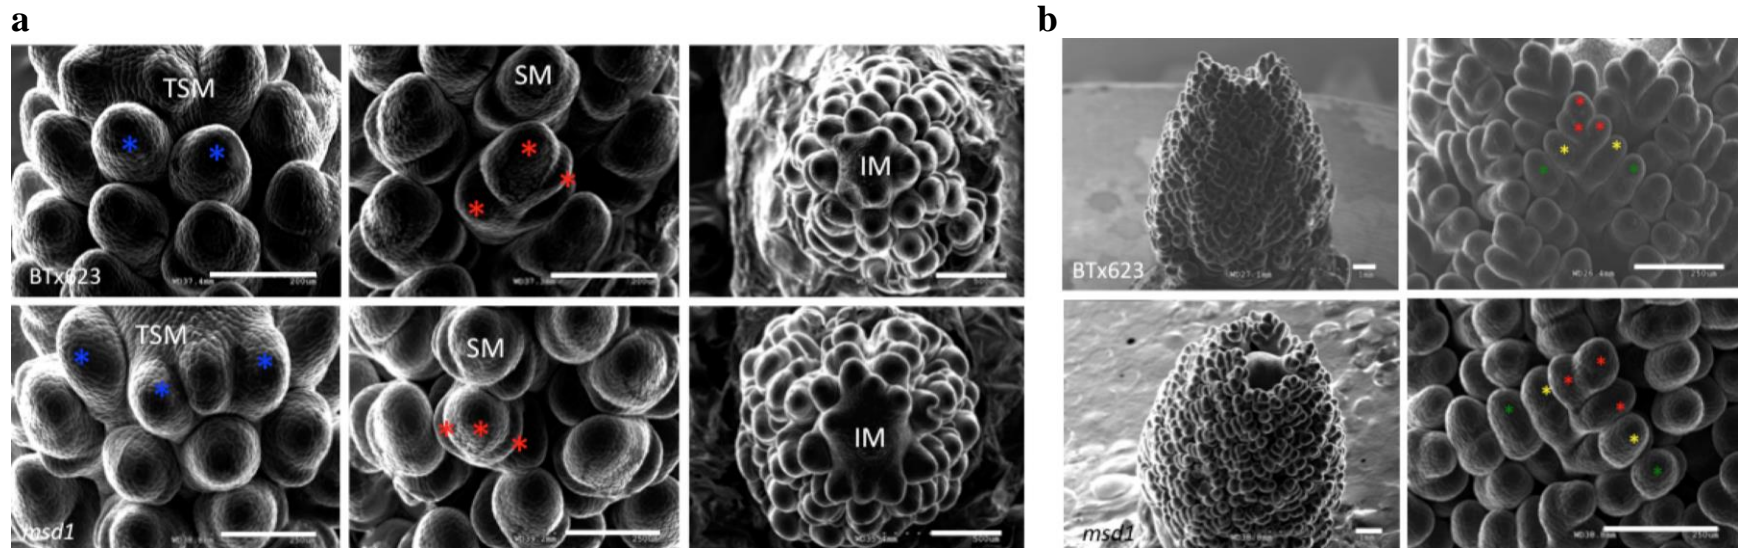

**Supplementary Fig. 2. SEM comparison of the development of inflorescence meristem at stage 1 and stage 2 in wild type and *msd1* mutant.** **a)** Stage 1 of WT (top panel) and *msd1* (bottom panel): left, top of inflorescence meristem; middle, bottom view of inflorescence meristem; right, overview from top. Blue asterisks indicate triple spikelet meristem (TSM), and red asterisks indicate spikelet meristem (SM). IM: inflorescence meristem. A single spikelet is observed at the top of the inflorescence meristem, and three spikelet meristems are located at the bottom of the inflorescence meristem. Bar: 200um. **b)** Stage 2 of WT BTx623 (top panel) and *msd1* (bottom panel): left, general view of inflorescence meristem; right, magnification of inflorescence meristem at stage 2. Three red asterisks indicate three spikelet meristems. Two more spikelet meristems (yellow asterisks) are observed below the three spikelet meristems (red asterisks) in both WT and *msd1*. Two additional spikelet meristems (green asterisks) are located below the two spikelet meristems (yellow asterisks) in both WT and *msd1*. Bar: 250um.

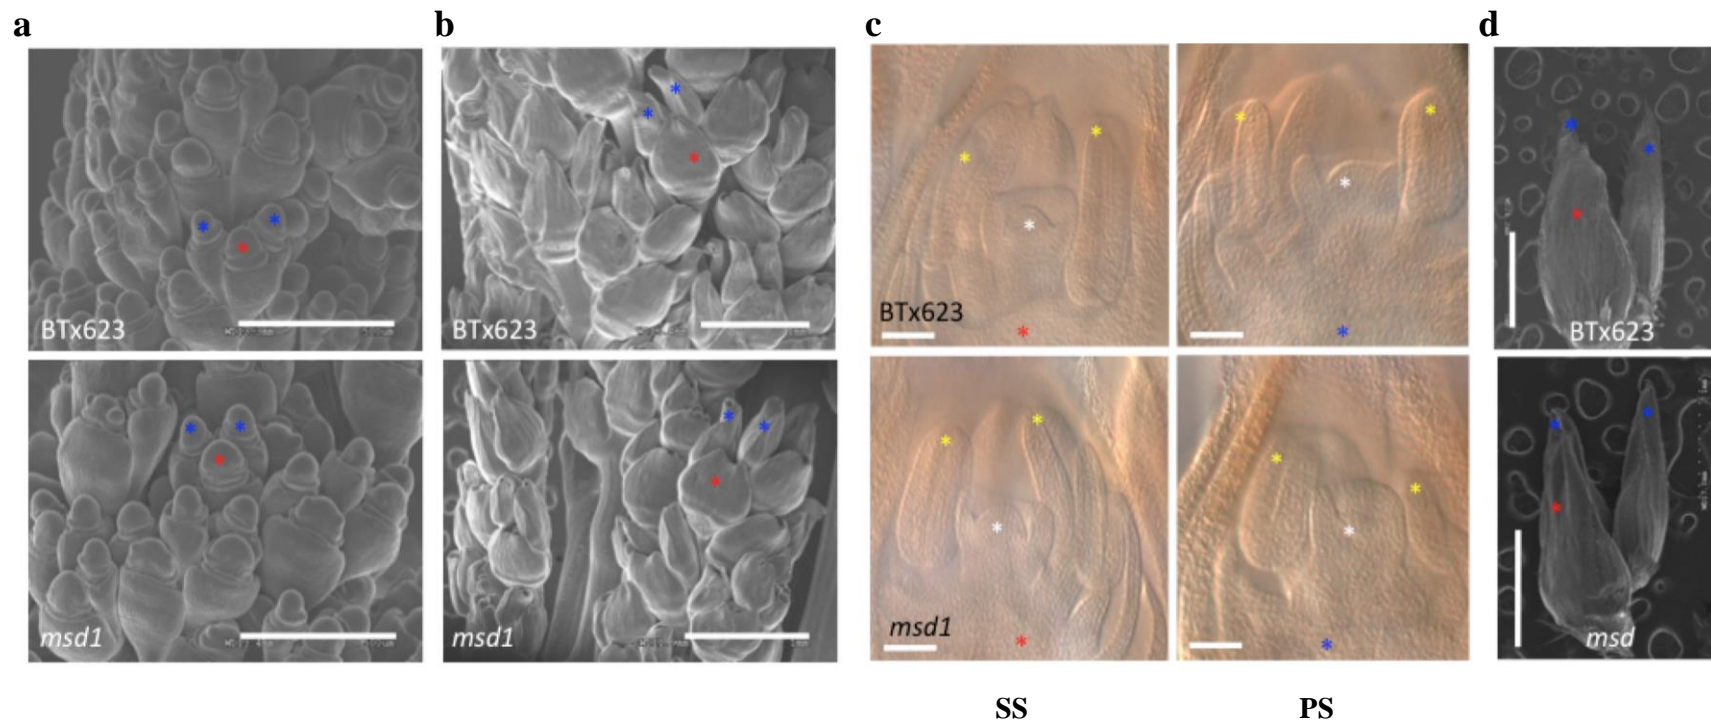

**Supplementary Fig 3. Comparison of WT and *msd1* from floral transition to floret developmental stages.** **a)** Panicle phenotype at the floral transition stage in WT (top) and *msd1* (bottom). The sessile spikelet (SS) is more expanded than the pedicellate spikelet (PS), reflecting the fact that the SS develops slightly earlier. Bar: 500um. **b)** Panicle phenotype at the stage 4 in wild type (top) and *msd1* (bottom), determined by SEM. Bar: 1mm. **c)** Panicle phenotype at stage 4 in wild type (top) and *msd1* (bottom) without dissection. Phenotype was observed under a Nomarski microscope. Top, wild type; bottom, *msd1*. Bar: 100  $\mu$ m. White asterisk indicate ovary. Yellow asterisk indicate anther in BTx623 and *msd1*. **d)** Panicle phenotype at stage 5 in WT (top) and *msd1* (bottom), determined by SEM. Red asterisk indicates sessile spikelet (SS), and blue asterisk indicates pedicellate spikelet (PS). Bar: 1mm.

Sb07g021140.1[Sorghum\_bicolor] SPVPVVDAGVHAAAPRKRKPFRTDRHSKI<sup>↓</sup>RTAQGVDRDRMRLSVGVAREFFALQDRLGFDKASKTVNWLL 128  
 GRMZM2G166687\_P01[Zea\_mays] SPPVVDDAGVQAAAVLRKRKPFRTDRHSKI<sup>↓</sup>RTAQGVDRDRMRLSVGVAREFFALQDRLGFDKASKTVNWLL 124  
 GRMZM2G060319\_P01[Zea\_mays] SSPVVDDGGGHAAP--RRRPFRTDRHSKI<sup>↓</sup>RTAQGVDRDRMRLSVGVAREFFALQDRLGFDKASKTVNWLL 123  
 OS08T0432300-00[Oryza\_sativa] GGGGAGGSSPAAAAAATRRRPFRTDRHSKI<sup>↓</sup>RTAQGVDRDRMRLSVGVARDFFALQDKLGFDKASRTVEWLL 166  
 BRADI3G36590.1[Brachypodium\_distachyon] -----INGAGRKRPFRTDRHSKI<sup>↓</sup>RTAQGVDRDRMRLSVGVARDFFALQDLLGFDKASNTVDWLL 185  
 MLOC\_58142.1[Hordeum\_vulgare] -----ALGAARKRPFRTDRHSKI<sup>↓</sup>RTAQGVDRDRMRLSVGVARDFFALQDLLGFDKASKTVDWLL 114  
 gi|473980361[Triticum\_urartu] TGAVQAAG--TGHARARKRPFRTDRHSKI<sup>↓</sup>RTAQGVDRDRMRLSLDVARDFALQDQLGFDKASKTVDWLL 122  
 gi|474405709[Triticum\_urartu] VGTAQSLHGGGGLDSAAAAAARKDRHSKI<sup>↓</sup>CTAGGMRDRMRLSLDVARKFFALQDMLGFDKASKTVQWLL 156  
 gi|703912869[Miscanthus\_ecklonii] NG-APAAGQGGQHARARKRPFRTDRHSKI<sup>↓</sup>RTAQGVDRDRMRLSLDVARDFFSLQDRLGFDKASKTVDWLL 94  
 gi|703912871[Miscanthus\_ecklonii] NGVAAAAGQGGQHARARKRPFRTDRHSKI<sup>↓</sup>RTAQGVDRDRMRLSLDVARDFFSLQDRLGFDKASKTVDWLL 95  
 gi|703912873[Miscanthus\_ecklonii] NGVAAAAGQGGQHARARKRPFRTDRHSKI<sup>↓</sup>RTAQGVDRDRMRLSLDVARDFALQDRLGFDKASKTVDWLL 95

Sb07g021140.1[Sorghum\_bicolor] TQSKPAIDRLVDAEP-----AV<sup>↓</sup>ALVSGGP--PTVVKGRGEGNSSSTCCLTVDSR---EEATEKA 183  
 GRMZM2G166687\_P01[Zea\_mays] AOSKPAIDRLVDAAD-----QA<sup>↓</sup>AVVTGGG--PTLVKGRGEGNSSSTCCLTDSRE---ELATEKG 178  
 GRMZM2G060319\_P01[Zea\_mays] TQSKPAIDRLVDAAAAADD-----PA<sup>↓</sup>AVASGGRRPTVVRGRGEGSSSSTCCCLTDSREAAEEATGNG 186  
 OS08T0432300-00[Oryza\_sativa] TQSKHAINRLTLPDSADA-----AA<sup>↓</sup>APAFAAA--PPPADQHSSAMAAAAASA<sup>↓</sup>AKEKGEASSSTTNA 226  
 BRADI3G36590.1[Brachypodium\_distachyon] TQSKPAIDRLSLSDSSTP-----Q<sup>↓</sup>QGVPAVAA--AITGKEKGEAAAAATA-----SSSTSTGCF 237  
 MLOC\_58142.1[Hordeum\_vulgare] TQSKPAIDRLANAAQGS-----AV<sup>↓</sup>PAAAG--PST-KEG-----ATSSSTGCF 153  
 gi|473980361[Triticum\_urartu] TQSKPAIDRLSESSLN-----A<sup>↓</sup>AARAGEDGMSLSLSSVEREGRRLKETELAAGSGKGAADAEKAM 181  
 gi|474405709[Triticum\_urartu] NTSKGTIREVMTDEASSDCEEGGSSSSLSVVDGKHKPPGTEAGGGDHGEGKKMPRAARRAPANPKPQRKW 226  
 gi|703912869[Miscanthus\_ecklonii] TQSKPAIERLAATEPSQ-----RSV<sup>↓</sup>GGSD-DAALSPP-----TSGAADGSGKGGGVAEKL 144  
 gi|703912871[Miscanthus\_ecklonii] TQSKPAIERLAATEPSQ-----RSV<sup>↓</sup>GGSD-DAALSPP-----TSGAADGSGKGGGVAEKL 145  
 gi|703912873[Miscanthus\_ecklonii] TQSKPAIERLAATEPSQ-----RSV<sup>↓</sup>GGSD-DAALSPP-----TSGAADGSGKGGGVAEKL 144

Sb07g021140.1[Sorghum\_bicolor] RSRGGGGGGTGGPDGPPALMEEHG-RGELG<sup>↓</sup>WIMTEATAAAAAATAQ--PQQMDGLEYYYQYCLQLEEMMR 250  
 GRMZM2G166687\_P01[Zea\_mays] RSRAG----DAGLDWFPFLIEEHG-CGELG<sup>↓</sup>WIMSEATATP-----EQDGLECYYYQYCLQLEELMR 233  
 GRMZM2G060319\_P01[Zea\_mays] RSRGGP---DDGP--PALLEGHGCGGELG<sup>↓</sup>WIMSGAPTAAVATTTTTTTPQPPDGHEYYYQYCLQLEEMMR 251  
 OS08T0432300-00[Oryza\_sativa] SSARARNRDHDGSSPVAPMDERGRRGV<sup>↓</sup>ELDWTAAAAAST-----EQPMDGLEYYYQYCNHLEEIMS 287  
 BRADI3G36590.1[Brachypodium\_distachyon] RDERATER-----MESIGDVSGDGG<sup>↓</sup>EMDWFASGAPAM-----EQPMEGLDYYYQYQY-QL<sup>↓</sup>EEMMR 290  
 MLOC\_58142.1[Hordeum\_vulgare] EDAREEEHD-----VRDLMKSIGGEG<sup>↓</sup>ELDWFMS<sup>↓</sup>EAA<sup>↓</sup>AIDI-----EQPMEGLELD----- 198  
 gi|473980361[Triticum\_urartu] KARGGG-----TSVLM<sup>↓</sup>EH<sup>↓</sup>R--RENGGLMSASMTGG-----BY<sup>↓</sup>YD-LGEMMC 219  
 gi|474405709[Triticum\_urartu] ASPHPIPKESRTKARERARERTREKNR<sup>↓</sup>MRV<sup>↓</sup>TLASTINIEPAATGMAAARADELITRPHNFINRSSSLN 296  
 gi|703912869[Miscanthus\_ecklonii] GSRSGGS-----ASMEME<sup>↓</sup>HT--CEL<sup>↓</sup>DRLVSAAPVLR-----EY<sup>↓</sup>YGLSEMVS 184  
 gi|703912871[Miscanthus\_ecklonii] GSRSGGS-----ASMEME<sup>↓</sup>HT--CEL<sup>↓</sup>DRLVSAAPVLR-----EY<sup>↓</sup>YGLSEMVS 185  
 gi|703912873[Miscanthus\_ecklonii] GSRSGGS-----ASMEME<sup>↓</sup>HT--CEL<sup>↓</sup>NRLVSAAPVLR-----EY<sup>↓</sup>YGLSEMVS 184

Supplementary Fig. 4. Amino acid changes caused by mutations in *msd1* mutants are conserved across the grass family. The changes are pointed by red arrows.

**a**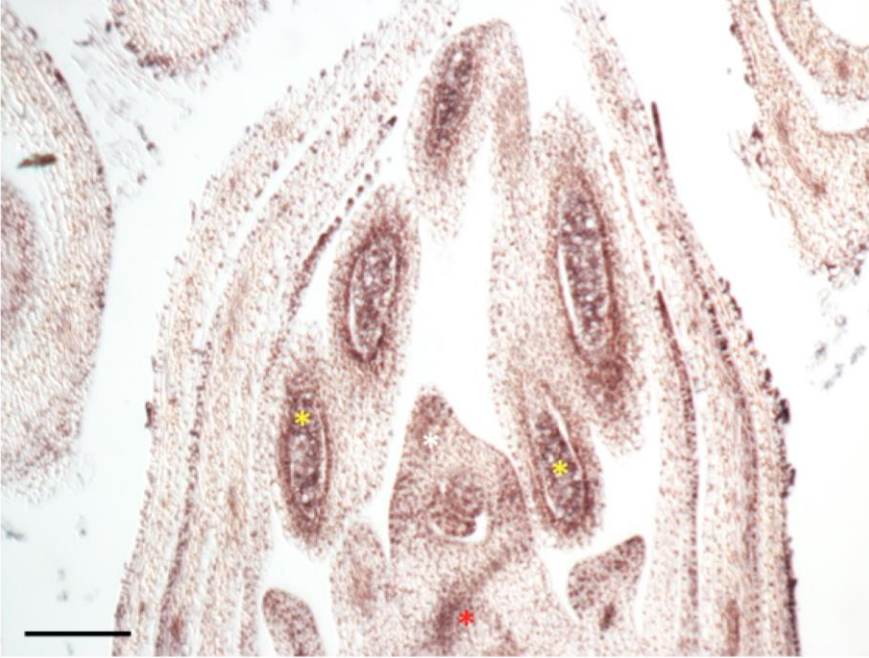**b**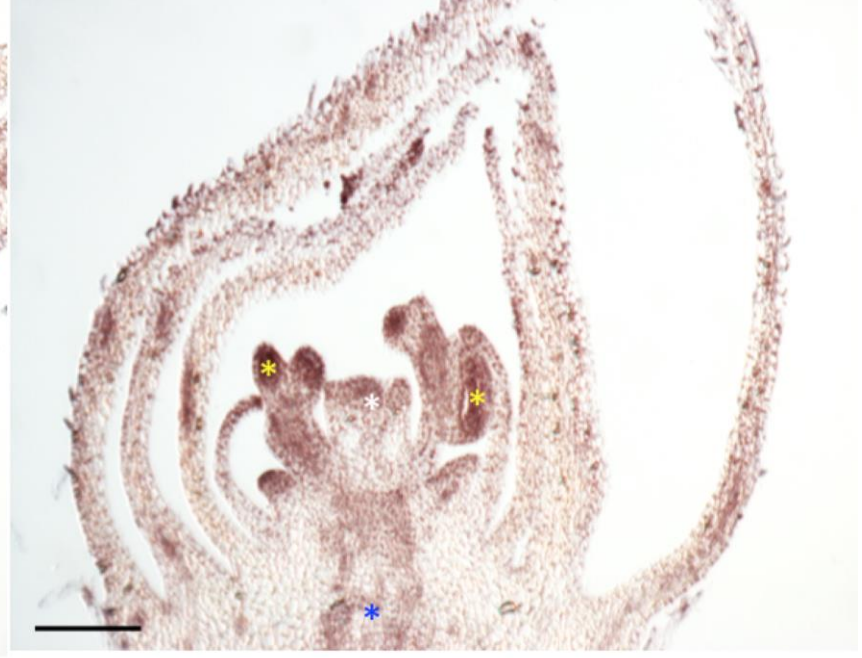

**Supplementary Fig. 5. *In situ* hybridization of *MSD1* at the stage 4 in WT. a)** longitudinal section of sessile spikelet (SS) at stage 4, labeled with antisense probe. **b)** Longitudinal section of pedicellate spikelet (PS) in stage 4. White asterisk indicates ovary, and yellow asterisks indicate anthers. Red asterisk indicates SS, and blue asterisk indicates PS. Bar: 100  $\mu$ m.

**a**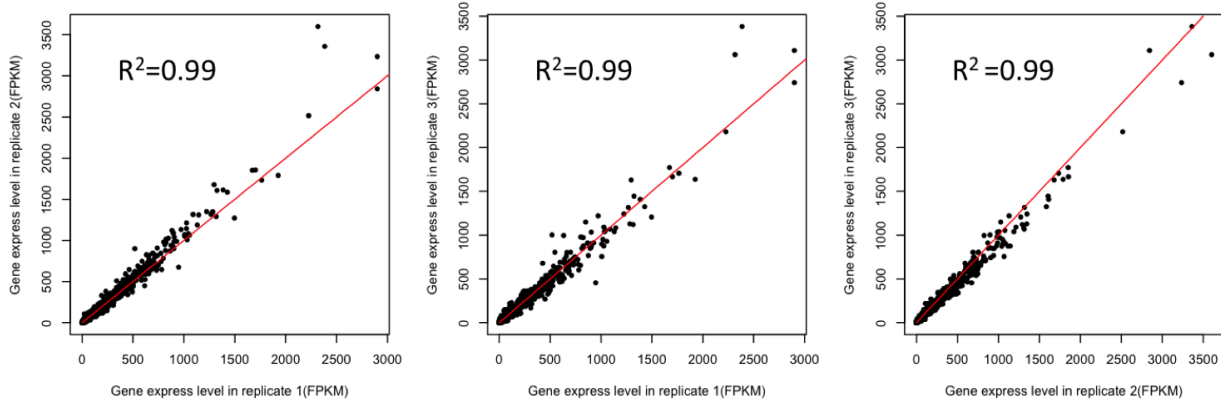**b**

|               | Tissue    | Genotype |
|---------------|-----------|----------|
| Wild type     | stage1    | G        |
|               | stage4-PS | G        |
|               | stage5-PS | G        |
|               | stage5-SS | G        |
| <i>msd1-1</i> | stage3    | A        |
|               | stage4-PS | A        |
|               | stage4-SS | A        |
|               | stage5-PS | A        |
|               | stage5-SS | A        |

**Supplementary Fig. 6. Quality control of transcriptome profiling of the inflorescence at different stages in WT and the *msd1-1* mutant.** **a)** Example of high correlation among three biological replicates. The correlation coefficient was first calculated among the three replicates. After discarding two samples ( $R^2 < 0.9$  relative to another sample), the average Pearson correlation coefficient of the replicates was 0.97, indicating that the remaining samples were of high quality. **b)** The *MSD1* gene genotype of the *msd1-1* mutant was confirmed in the RNA-seq data.

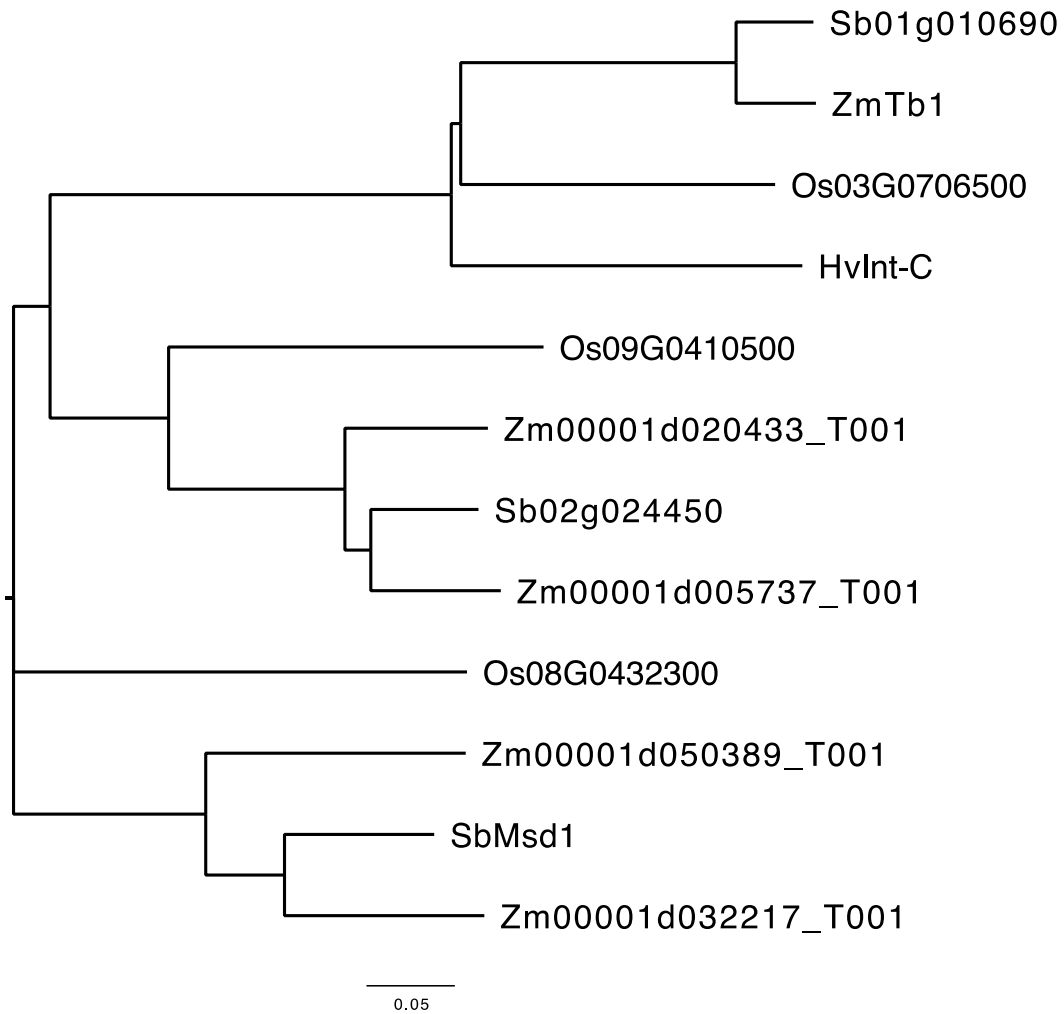

**Supplementary Fig. 7.** Neighbor-joining tree of maize *Tb1*, sorghum *MSD1*, Barley *Int-C* gene and other TCP transcriptional factors of the CYC/TB1 subgroup in maize (Zm), sorghum (Sb), and rice (Os).



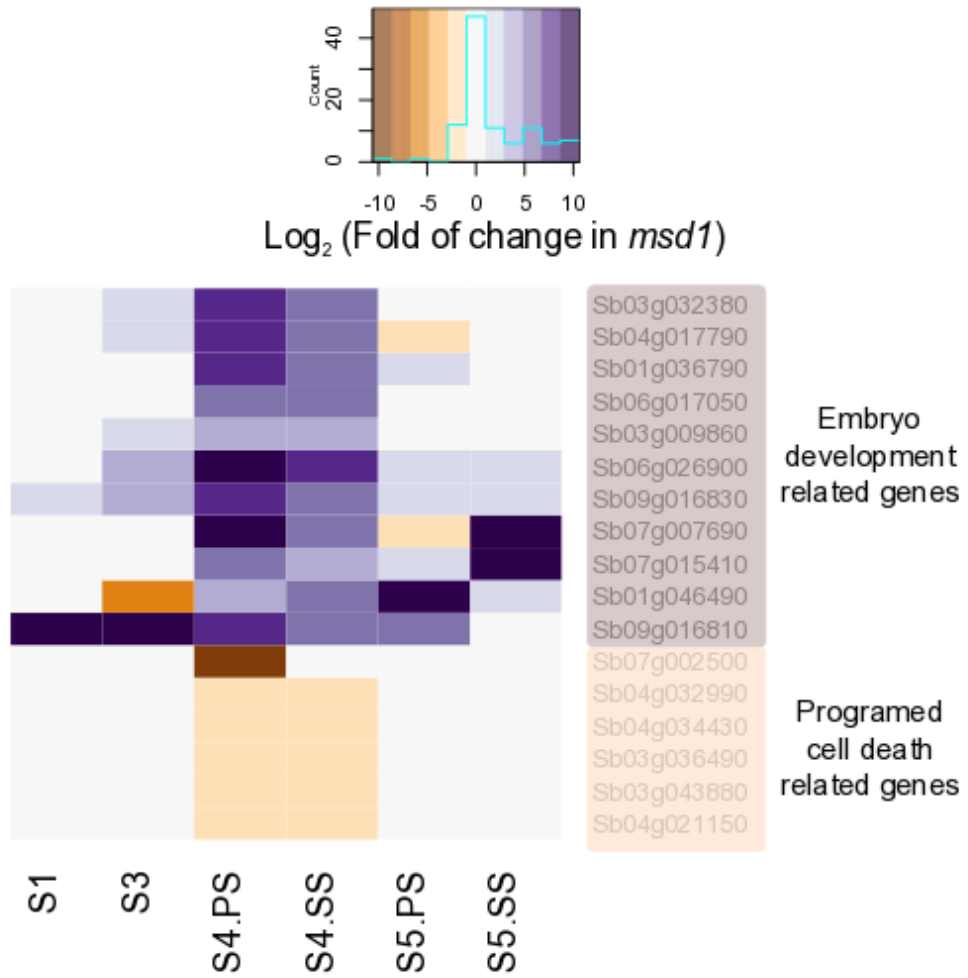

**Supplementary Fig. 8. Changes in the expression of genes involved in embryo development and programmed cell death.** The colors represent ( $\log_2$  [FPKM in *msd1*] / [FPKM in WT]).

**Supplementary Table 1. Complementation analysis of *msd1* alleles.**

|               | <i>msd1-1</i> | <i>msd1-2</i> | <i>msd1-3</i> | <i>msd1-4</i> | <i>msd1-5</i> | <i>msd1-6</i> | <i>msd1-7</i> |
|---------------|---------------|---------------|---------------|---------------|---------------|---------------|---------------|
| <i>msd1-1</i> |               |               |               |               |               |               |               |
| <i>msd1-2</i> | <i>msd</i>    |               |               |               |               |               |               |
| <i>msd1-3</i> | <i>msd</i>    |               |               |               |               |               |               |
| <i>msd1-4</i> | <i>msd</i>    |               | <i>msd</i>    |               |               |               |               |
| <i>msd1-5</i> | <i>msd</i>    |               |               | <i>msd</i>    |               |               |               |
| <i>msd1-6</i> | <i>msd</i>    |               | <i>msd</i>    |               | <i>msd</i>    |               |               |
| <i>msd1-7</i> | <i>msd</i>    |               | <i>msd</i>    | <i>msd</i>    |               | <i>msd</i>    |               |

\**msd1-1* and *msd1-2* were known to be allelic before the *MSD1* gene was identified. All F1 plants from crosses of *msd1-1* to newly identified *msd1* alleles discovered by sequencing of *msd* mutants exhibited the *msd1* phenotype. A few crosses between the new alleles of *msd1* also exhibited the *msd* phenotype. The results of the complementation test revealed that *Sb07g021140* is the *MSD1* gene. Black squares represent self-pollination. Blank squares indicate complementation crosses that were not performed.

**Supplementary Table 2. Summary of the amount of data generated by RNA-seq.**

|                       |             | S1: Inflorescence<br>meristem | S3: Floral<br>transition | S4: Floral Stage 1 |             | S5: Floral Stage 2 |             |
|-----------------------|-------------|-------------------------------|--------------------------|--------------------|-------------|--------------------|-------------|
|                       |             |                               |                          | SS                 | PS          | SS                 | PS          |
| BTx623                | Replicate 1 | 47,687,824                    | 41,772,776               | 113,694,762        | 129,785,826 | 45,137,206         | 101,194,034 |
|                       | Replicate 2 | 25,577,260                    | 65,589,362               | 74,831,556         | 97,749,120  | 95,511,818         | 69,511,744  |
|                       | Replicate 3 | 41,773,186                    | 44,243,680               | 65,393,744         | 76,469,852  | 170,454,056        | 64,850,906  |
| <i>msd1</i><br>mutant | Replicate 1 | 32,565,494                    | 30,692,720               | 45,024,586         | 71,309,336  | 89,798,568         | 64,127,766  |
|                       | Replicate 2 | 65,145,788                    | 26,076,258               | 26,396,264         | 40,340,992  | 82,484,548         | 72,818,954  |
|                       | Replicate 3 | 35,007,414                    | 38,994,690               | 38,768,952         | 48,652,344  | 106,433,328        | 72,850,352  |

\*The numbers are in bp.

**Supplementary Table 3. Summary of genes differentially expressed between WT and the *msd1* mutant.**

|       | No. of expressed gene |             | Differential expression gene<br>(FDR adjusted $p < 0.05$ )* | Uniquely expressed gene<br>(FPKM > 1) |             |
|-------|-----------------------|-------------|-------------------------------------------------------------|---------------------------------------|-------------|
|       | WT                    | <i>msd1</i> |                                                             | WT                                    | <i>msd1</i> |
| S1    | 21,047                | 21,121      | 1,239                                                       | 33                                    | 23          |
| S3    | 21,470                | 22,247      | 1,500                                                       | 75                                    | 34          |
| S4-PS | 24,580                | 21,448      | 10,226                                                      | 156                                   | 436         |
| S4-SS | 23,846                | 22,218      | 8,490                                                       | 230                                   | 339         |
| S5-PS | 23,250                | 24,120      | 1,685                                                       | 69                                    | 32          |
| S5-SS | 24,223                | 24,590      | 2,063                                                       | 42                                    | 36          |
| Total | 26,654                | 27,218      | 13,527                                                      | 557                                   | 997         |

\*P value was adjusted by the FDR from the Benjamini-Hochberg correction for multiple-testing.

**Supplementary Table 4. The 10 most highly up-regulated and uniquely expressed in PS in the *msd1* mutant at stage 4.**

|             | WT<br>(FPKM) | <i>msd1</i><br>(FPKM) | Fold of change | Function annotation                                         |
|-------------|--------------|-----------------------|----------------|-------------------------------------------------------------|
| Sb06g026900 | 0.238861     | 371.468               | 1555.16        | Late embryogenesis abundant protein,<br>group 1 protein     |
| Sb01g012640 | 0.171734     | 126.108               | 734.322        | cupin family protein                                        |
| Sb04g017790 | 0.305038     | 120.424               | 394.784        | Seed maturation protein                                     |
| Sb09g016810 | 0.285748     | 92.2867               | 322.965        | Late embryogenesis abundant 6                               |
| Sb03g032380 | 0.452652     | 139.698               | 308.621        | Late embryogenesis abundant protein<br>(LEA) family protein |
| Sb01g036790 | 0.272418     | 41.8924               | 153.78         | embryonic cell protein 63                                   |
| Sb09g016830 | 2.06676      | 295.181               | 142.823        | Late embryogenesis abundant 1                               |
| Sb10g003700 | 0.81532      | 115.233               | 141.335        | dehydrin xero 1                                             |
| Sb02g040650 | 0.26434      | 32.7906               | 124.047        | 1-cysteine peroxiredoxin 1                                  |
| Sb01g043980 | 0.248705     | 29.2706               | 117.692        | RmlC-like cupins superfamily protein                        |
| Sb02g022095 | 0            | 92.343                | inf            |                                                             |
| Sb05g016755 | 0            | 41.0056               | inf            |                                                             |
| Sb03g027122 | 0            | 35.2284               | inf            |                                                             |
| Sb01g009730 | 0            | 32.6082               | inf            |                                                             |
| Sb07g021917 | 0            | 31.9366               | inf            |                                                             |
| Sb03g011080 | 0            | 25.9257               | inf            |                                                             |
| Sb07g023010 | 0            | 25.1244               | inf            | alpha-amylase-like                                          |
| Sb02g010080 | 0            | 22.7582               | inf            | AWPM-19-like family protein                                 |
| Sb07g007690 | 0            | 22.6408               | inf            | Late Embryogenesis Abundant 4-5                             |
| Sb03g019411 | 0            | 20.1341               | inf            |                                                             |

**Supplementary Table 5. GO term enrichment in genes up-regulated in PS in the *msd1* mutant at stage 4.**

| GO term    | Description                                  | No. of up-regulated genes | No. of genes in sorghum genome | p-value  | FDR      |
|------------|----------------------------------------------|---------------------------|--------------------------------|----------|----------|
| GO:0009791 | post-embryonic development                   | 965                       | 1644                           | 2.00E-49 | 3.70E-45 |
| GO:0032501 | multicellular organismal process             | 2037                      | 4820                           | 3.50E-28 | 3.30E-24 |
| GO:0007275 | multicellular organismal development         | 1875                      | 4512                           | 7.50E-23 | 4.70E-19 |
| GO:0009987 | cellular process                             | 5750                      | 16277                          | 7.00E-20 | 3.30E-16 |
| GO:0044085 | cellular component biogenesis                | 628                       | 1307                           | 3.20E-16 | 1.20E-12 |
| GO:0032502 | developmental process                        | 2052                      | 5263                           | 3.20E-15 | 1.00E-11 |
| GO:0003006 | reproductive developmental process           | 768                       | 1695                           | 4.50E-15 | 1.20E-11 |
| GO:0006996 | organelle organization                       | 840                       | 1895                           | 1.10E-14 | 2.60E-11 |
| GO:0016043 | cellular component organization              | 1314                      | 3205                           | 3.40E-14 | 7.20E-11 |
| GO:0065007 | biological regulation                        | 2754                      | 7386                           | 1.80E-13 | 3.00E-10 |
| GO:0022607 | cellular component assembly                  | 410                       | 807                            | 1.60E-13 | 3.00E-10 |
| GO:0034641 | cellular nitrogen compound metabolic process | 370                       | 718                            | 6.20E-13 | 9.80E-10 |
| GO:0009886 | post-embryonic morphogenesis                 | 105                       | 122                            | 7.90E-13 | 1.20E-09 |
| GO:0065003 | macromolecular complex assembly              | 325                       | 612                            | 1.10E-12 | 1.40E-09 |
| GO:0044260 | cellular macromolecule metabolic process     | 3252                      | 8922                           | 2.20E-12 | 2.80E-09 |
| GO:0050789 | regulation of biological process             | 2437                      | 6509                           | 3.20E-12 | 3.80E-09 |
| GO:0043933 | macromolecular complex subunit organization  | 356                       | 698                            | 4.60E-12 | 5.10E-09 |
| GO:0006461 | protein complex assembly                     | 204                       | 342                            | 1.30E-11 | 1.30E-08 |
| GO:0070271 | protein complex biogenesis                   | 204                       | 342                            | 1.30E-11 | 1.30E-08 |
| GO:0048856 | anatomical structure development             | 1500                      | 3841                           | 4.60E-11 | 4.30E-08 |

\*The analysis was done by agriGO (<http://bioinfo.cau.edu.cn/agriGO/>). The enrichment was calculated by the Hypergeometric test. Multi-test adjustment was performed by the Yekutieli (FDR under dependency) method.

**Supplementary Table 6. Primers used in RT-PCR and *in situ* experiments.**

| Primer name information | GENE ID     | Method                              | Sequence information                                              |
|-------------------------|-------------|-------------------------------------|-------------------------------------------------------------------|
| Sb-MSD1-RT-2127F        | Sb07g021140 | qRT-PCR                             | CTACTACCAGTATTGCCTGCAGCTC                                         |
| Sb-MSD1-RT-2128R        | Sb07g021140 | qRT-PCR                             | GTACTATGTAGCAACGGATCATGG                                          |
| SB_EIF4 $\alpha$ -2279F | Sb04g003390 | qRT-PCR                             | CAACTTTGTCACCCGCGATGA                                             |
| SB_EIF4 $\alpha$ -2280R | Sb04g003390 | qRT-PCR                             | TCCAGAAACCTTAGCAGCCCA                                             |
| Sorghum-insitu-3p-1708F | Sb07g021140 | Cloning for <i>in situ</i>          | GGGCTGGATCATGACGGAGGCCACAGCG                                      |
| Sorghum-insitu-3p-1709R | Sb07g021140 | Cloning for <i>in situ</i>          | GCTAATGGGCTTTAATTGATAGAGAAA                                       |
| MSD1-2087F              | Sb07g021140 | Cloning for tobacco transient assay | ATGCCGTCGACCGCGATGTCTTGGGACG                                      |
| MSD1-2088R              | Sb07g021140 | Cloning for tobacco transient assay | CCTTGGCATTCCCTCCGTTGCATCTCATCAT                                   |
| MSD1-2089F              | Sb07g021140 | Cloning for tobacco transient assay | GGGGACAAGTTTGTACAAAAAAGCAGGCTCCATGCCGTCGAC<br>CGCGATGTCTTGGGACG   |
| MSD1-2090R              | Sb07g021140 | Cloning for tobacco transient assay | GGGGACCACTTTGTACAAGAAAGCTGGGTGCCTTGGCATTCCCT<br>CCGTTGCATCTCATCAT |
